# Supplementary material for: Designing a Summer Transition Program for Incoming and Current College Students on the Autism Spectrum: A Participatory Approach
Source: PubMed Central journal article supplement (PMC5816926; doi:10.3389/fpsyg.2018.00046), 2018-02-13
Supplement: Table1.pdf [file Table1.pdf]

Appendix A: Syllabi from Summer Transition Programs 1 and 2

**Summer Transition Program 1**  
**[COLLEGE]**

**Department of Psychology and Center for Student Accessibility**

**Instructor One:** [NAME]

**Email:** [E-MAIL ADDRESS]

**Class Location:** [CLASS LOCATION]

**Meeting Time:** August 18<sup>th</sup>-21<sup>st</sup> from 12pm-5pm each day; August 22<sup>nd</sup> from 12pm-3pm

**Instructor Two:** [NAME]

**Email:** [E-MAIL ADDRESS]

**Course Objectives:** There are four main areas of focus for this program that include developing social skills, self-advocacy skills, classroom readiness skills, and technology skills. All of these have been identified as important skills to develop for the first year of college.

**Readings:** Hand-outs and articles will be assigned throughout the week. All additional readings and assignments will be uploaded to Blackboard.

**Student Privacy Statement:**

At times, students may disclose personal information through workshop discussions. It is expected that the class will respect the privacy of their classmates. The information disclosed in this class should not be repeated or discussed with other students outside of the course.

**How to do well in this program:**

- ✓ COMPLETE any mini-homework assignments before each class.
- ✓ OUTLINE or take notes on the lectures and readings.
- ✓ PARTICIPATE in class discussions, activities, and engage in critical thinking.
- ✓ CHECK Blackboard regularly for announcements, assignments, discussions and more.

**Participation & Attendance:** Participation involves listening to peers', contributing to the discussions online and in-person, and asking questions during the workshops. All phones should be turned off and put away, and absolutely NO TEXTING is permitted during the program.

All Students are expected to attend all workshop dates. If you miss a workshop day, you should find out what you missed from another student in the workshop.

**Constructive Feedback:** There will be many opportunities for you to receive feedback from the instructors, program volunteers, and your peers. In addition, you'll be expected to provide constructive feedback to your peers. You should be giving feedback to others that can help build them up in a way that lets them know you're on their side. Your feedback should not put people down, but should instead help people to improve their skills.

## WORKSHOP SCHEDULE

\*Please note that this is a tentative schedule that it is subject to change.

| <b>Date</b>   | <b>Topics</b>                                       | <b>Assignment Due</b>        |
|---------------|-----------------------------------------------------|------------------------------|
| Mon.<br>8/18  | Introduction Activity & Group Promises              |                              |
|               | Syllabus Overview                                   |                              |
|               | Classroom Readiness: Learning Styles & Study Skills |                              |
|               | Leadership Game                                     |                              |
|               | Social: Reading Body Language                       |                              |
|               | Social Skills: Friendships                          |                              |
|               | Campus Resources                                    |                              |
|               | Advocacy Skills: Sensory Preferences                |                              |
| Tues.<br>8/19 | Classroom Skills: Blackboard                        | Email a Professor Assignment |
|               | Advocacy: Intro.                                    |                              |
|               | Classroom Skills:<br>Leadership & Public Speaking   |                              |
|               | Advocacy Skills:<br>ASD                             |                              |
|               | Advocacy Skills:<br>Accommodations                  |                              |
|               | Social: Self-Regulation                             |                              |
| Wed.<br>8/20  | Social Skills: Facebook and Email                   |                              |
|               | Presentation Work                                   |                              |
|               | Social Skills: Conversations                        |                              |
|               | Social Skills:                                      |                              |

|                |                                             |                                              |
|----------------|---------------------------------------------|----------------------------------------------|
|                | Resolving Disagreements                     |                                              |
|                | Advocacy Skills:<br>Identifying Laws        |                                              |
|                | Campus Resources:<br>Scavenger Hunt         |                                              |
| Thurs.<br>8/21 | Social: Small Talk                          | Email Your Professor<br>Assignment (part II) |
|                | Social Skills:<br>Social Networking Sites   |                                              |
|                | Classroom Skills:<br>Classroom Etiquette    |                                              |
|                | Classroom Skills:<br>Note-Taking & Planning |                                              |
|                | Presentations and Party                     |                                              |

**Use of Blackboard:** Students in this training are required to use Blackboard. It is your responsibility to check Blackboard regularly (at least once a day) for announcements and assignments. It is essential that you are able to receive emails through blackboard as that will be the primary means for out-of-class communication.

### **Blackboard and Email**

For many assignments and communications Blackboard will be the medium of communication. Please make sure you can log into this course on Blackboard.

Please understand I receive many emails each day. To ensure your email is seen, read, and receives a timely response use the following format for all email communications with me:

To: [E-MAIL ADDRESS]

Subject: SUMMER TRANSITION YOUR LAST NAME (e.g. Smith) HOMEWORK ASSIGNMENT (OR any brief relevant words about the reason for your email)

\*Sign your FULL NAME to the email

**Summer Transition Program 2**  
**[NAME] College**  
**Department of Psychology**

**Instructors:** [NAMES]

**Emails:** [E-MAIL ADDRESSES]

**Class Dates:** August 3<sup>rd</sup> – August 7<sup>th</sup>

**Class Locations:** [CLASS LOCATION]

**Course Description:** This summer transition program will cover multiple skill sets that are believed to be useful in the college environment. Each day will include a variety of sessions that tackle different topics (e.g., self-advocacy, maintaining friendships, effective habits for engaging in small talk, etc.). These topics will be studied through Powerpoint Presentations, in-class activities such as scripted role-play's or small group tasks, games and interactive opportunities, and media clips. Throughout the week, instructors will provide students with opportunities to learn more about each topic, practice skills, and receive feedback on their application of these skills.

**Course Learning Objectives:** Students will learn how to define, evaluate and develop their skills in four broad domains:

*Academic readiness skills:* Students will practice identifying their learning styles, taking notes, and engaging productively in class activities

*Self-advocacy skills:* Students will practice defining, engaging in and evaluating self-advocacy

*Self-regulation skills:* Students will practice identifying and evaluating self-regulation strategies

*Social skills:* Students will practice engaging effectively with peers and instructors in the college environment

**Program Requirements:**

- Writing utensil and paper
- Binder for program materials
- Navigating College Handbook: This will be provided to each student on the first day.

**Student Privacy Statement:**

At times, students may disclose personal information through workshop discussions. *Students should never feel obliged to disclose anything they do not feel comfortable sharing.* Although all participants are expected to respect the privacy of their peers by not disclosing confidential information to people outside of this program, disclosure is always associated with the possibility of a breach of confidentiality. Therefore, each participant should only disclose as much personal information as he or she feels comfortable disclosing.

**How to do well in this program:**

- ✓ COMPLETE all assignments each day.
- ✓ OUTLINE or take notes on all lectures and readings.
- ✓ PARTICIPATE in class discussions, activities, and engage in critical thinking.

**Participation & Attendance:** Participation involves listening to peers’, contributing to discussions online and in-person, and asking questions. All phones should be turned off and put away, and absolutely NO TEXTING is permitted in the classroom. If you have an important communication to attend to, please excuse yourself from the classroom and attend to the communication in the hall. Leaving the classroom frequently is disruptive for other students so be sure to limit the amount of time you spend outside of the classroom during class activities. Students are expected to attend all programming dates. If you miss activities, you should find out what you missed from other students in the workshop.

**Constructive Feedback:** There will be many opportunities for you to receive feedback from the instructors, program volunteers, and your peers. In addition, you’ll be expected to provide constructive feedback to your peers. You should be giving feedback to others that can help build them up in a way that lets them know you’re on their side. Your feedback should not put people down, but should instead help people to improve their skills.

**Evaluation:** You will not be graded for your participation in this program as we would like for you to demonstrate intrinsic motivation.

However, you will receive written feedback on at least one key activity each day including:

- a. Your notes from two class activities \*On Tuesday and Thursday
- b. In-class writing/computer-based assignments \* One each day
- c. A presentation you create and share \*On the last day of the program

**SCHEDULE**

\*Please note that this is a tentative schedule that is subject to change.

| Date            | Topics                                                | Assignment Due     |
|-----------------|-------------------------------------------------------|--------------------|
| Mon.<br>8/3/15  | Pre-Assessments                                       |                    |
|                 | Game & Introductions                                  |                    |
|                 | Reading a Syllabus & Semester Planning                |                    |
|                 | Introduction to Self-Advocacy & Daily Jeopardy Review | Self-Check Quiz    |
| Tues.<br>8/4/15 | Game & Classroom Etiquette                            | Writing Assignment |
|                 | Self-Regulation                                       | Writing Assignment |
|                 | Lunch & Game                                          |                    |
|                 | Embracing Social Opportunities in College             | Writing Assignment |
|                 | Leadership & Public Speaking                          |                    |

|                  |                                                                        |                                              |
|------------------|------------------------------------------------------------------------|----------------------------------------------|
|                  |                                                                        |                                              |
|                  | Campus Scavenger Hunt, Review Self-Regulation, & Daily Jeopardy Review | Self-Check Quiz                              |
| Wed.<br>8/5/15   | Game & Engaging in Small Talk                                          |                                              |
|                  | Entering & Exiting Conversations                                       |                                              |
|                  | Autism Knowledge & Note-Taking                                         | Writing Assignment                           |
|                  | Lunch & Game                                                           |                                              |
|                  | Learning Styles & Study Skills                                         |                                              |
|                  | Disclosure & Speech Practice Time                                      |                                              |
|                  | Asking for Accommodations & Daily Jeopardy Review                      | Email Writing Assignment;<br>Self-Check Quiz |
| Thurs.<br>8/6/15 | Game & Reading Body Language                                           |                                              |
|                  | Sensory Preferences                                                    |                                              |
|                  | Lunch & Game                                                           |                                              |
|                  | Maintaining Friendships                                                |                                              |
|                  | Writing Skills                                                         |                                              |
|                  | Emailing Your Professors & Daily Jeopardy Review                       | Email Writing Assignment;<br>Self-Check Quiz |
| Fri.<br>8/7/15   | Final Jeopardy Review                                                  |                                              |
|                  | Public Speaking Activity                                               |                                              |
|                  | Pizza Party & Post-Assessments                                         |                                              |

**Email Communication**

Please understand that your instructors receive many emails each day. To ensure that your email is seen, read, and receives a timely response use the following format for all email communications with the instructors:

To: [EMAIL ADDRESS]

Subject: SUMMER TRANSITION YOUR LAST NAME (e.g. Smith) HOMEWORK ASSIGNMENT (OR any brief relevant words about the reason for your email)

\*Sign your FULL NAME to the email
